# Supplementary material for: Association of Core Muscle Strength and Endurance with Chronic Ankle Instability- A Cross-Sectional Study
Source: Research Square preprint supplement (doi:10.21203/rs.3.rs-6980458/v1), 2025-08-12
Supplement: Supplementary file 2 [file f9ea3976a4bdb52fce2f6741.xlsx]

## Sheet: CONTROL
S No.	Age	Gender	Affected Leg	CAIT SCORE	Core Strength value	CORE STRENGTH	CORE ENDURANCE (in sec)
					(mmHg)		Flexors	Extensors	Right LF	Left LF	F:E	Rating	R:L	Rating	R:E	Rating	L:E	Rating	OVERALL CORE ENDURANCE
C1	20	M		26	2.66	poor	148	85	60	60	1.74118	FALSE	1	TRUE	0.705882	TRUE	0.705882	TRUE	TRUE
C2	22	F		26	1.66	poor	127	94	12	19	1.35106	FALSE	0.631579	FALSE	0.12766	TRUE	0.202128	TRUE	TRUE
C3	24	F		30	1.33	poor	240	95	66	65	2.52632	FALSE	1.01538	TRUE	0.694737	TRUE	0.684211	TRUE	TRUE
C4	25	F		28	2.66	poor	668	50	59	41	13.36	FALSE	1.43902	FALSE	1.18	FALSE	0.82	FALSE	FALSE
C5	23	F		29	2	poor	80	89	37	43	0.898876	TRUE	0.860465	FALSE	0.41573	TRUE	0.483146	TRUE	TRUE
C6	21	M		30	13.33	good	130	70	21	68	1.85714	FALSE	0.308824	FALSE	0.3	TRUE	0.971429	FALSE	FALSE
C7	22	F		27	2.66	poor	120	65	27	36	1.84615	FALSE	0.75	FALSE	0.415385	TRUE	0.553846	TRUE	TRUE
C8	21	F		27	4.66	good	216	90	15	16	2.4	FALSE	0.9375	FALSE	0.166667	TRUE	0.177778	TRUE	TRUE
C9	21	F		29	4	good	211	165	68	97	1.27879	FALSE	0.701031	FALSE	0.412121	TRUE	0.587879	TRUE	TRUE
C10	20	F		27	6.66	good	196	87	17	22	2.25287	FALSE	0.772727	FALSE	0.195402	TRUE	0.252874	TRUE	TRUE
C11	21	F		27	2.66	poor	192	61	33	20	3.14754	FALSE	1.65	FALSE	0.540984	TRUE	0.327869	TRUE	TRUE
C12	20	F		28	2	poor	253	73	24	39	3.46575	FALSE	0.615385	FALSE	0.328767	TRUE	0.534247	TRUE	TRUE
C13	20	F		29	2	poor	217	94	79	57	2.30851	FALSE	1.38596	FALSE	0.840426	FALSE	0.606383	TRUE	FALSE
C14	20	F		25	4.66	good	323	111	42	51	2.90991	FALSE	0.823529	FALSE	0.378378	TRUE	0.459459	TRUE	TRUE
C15	20	F		29	0.66	poor	420	82	30	15	5.12195	FALSE	2	FALSE	0.365854	TRUE	0.182927	TRUE	TRUE
C16	20	F		30	2	poor	330	112	23	39	2.94643	FALSE	0.589744	FALSE	0.205357	TRUE	0.348214	TRUE	TRUE
C17	21	F		30	3.333	poor	113	112	41	59	1.00893	FALSE	0.694915	FALSE	0.366071	TRUE	0.526786	TRUE	TRUE
C18	22	M		29	10	good	43	85	44	60	0.505882	TRUE	0.733333	FALSE	0.517647	TRUE	0.705882	TRUE	TRUE
C19	19	F		30	1.33	poor	93	83	24	46	1.12048	FALSE	0.521739	FALSE	0.289157	TRUE	0.554217	TRUE	TRUE
C20	21	F		29	4	good	64	65	47	60	0.984615	TRUE	0.783333	FALSE	0.723077	TRUE	0.923077	FALSE	TRUE
C21	21	F		29	3.33	poor	205	202	57	70	1.01485	FALSE	0.814286	FALSE	0.282178	TRUE	0.346535	TRUE	TRUE
C22	21	F		28	0.33	poor	114	21	24	34	5.42857	FALSE	0.705882	FALSE	1.14286	FALSE	1.61905	FALSE	FALSE
C23	22	M		29	1.66	poor	70	92	33	25	0.76087	TRUE	1.32	FALSE	0.358696	TRUE	0.271739	TRUE	TRUE
C24	22	M		28	5.33	good	185	127	87	117	1.45669	FALSE	0.74359	FALSE	0.685039	TRUE	0.92126	FALSE	FALSE
C25	20	M		27	10	good	127	141	80	75	0.900709	TRUE	1.06667	FALSE	0.567376	TRUE	0.531915	TRUE	TRUE
C26	21	F		28	2	poor	72	56	16	14	1.28571	FALSE	1.14286	FALSE	0.285714	TRUE	0.25	TRUE	TRUE
C27	21	F		28	2.66	poor	292	78	37	34	3.74359	FALSE	1.08824	FALSE	0.474359	TRUE	0.435897	TRUE	TRUE
C28	21	F		29	2	poor	272	75	36	10	3.62667	FALSE	3.6	FALSE	0.48	TRUE	0.133333	TRUE	TRUE
C29	20	M		27	8.66	good	200	143	39	37	1.3986	FALSE	1.05405	FALSE	0.272727	TRUE	0.258741	TRUE	TRUE
C30	22	F		26	4	good	158	58	83	44	2.72414	FALSE	1.88636	FALSE	1.43103	FALSE	0.758621	FALSE	FALSE
C31	22	F		27	2	poor	95	40	13	27	2.375	FALSE	0.481481	FALSE	0.325	TRUE	0.675	TRUE	TRUE
C32	22	M		30	32.66	good	240	71	66	71	3.38028	FALSE	0.929577	FALSE	0.929577	FALSE	1	FALSE	FALSE
C33	22	F		30	2.66	poor	135	35	23	24	3.85714	FALSE	0.958333	TRUE	0.657143	TRUE	0.685714	TRUE	TRUE
C34	23	M		30	4	good	77	101	111	112	0.762376	TRUE	0.991071	TRUE	1.09901	FALSE	1.10891	FALSE	TRUE
C35	21	F		25	2.66	poor	62	42	20	9	1.47619	FALSE	2.22222	FALSE	0.47619	TRUE	0.214286	TRUE	TRUE
C36	19	F		30	3.33	poor	180	38	41	14	4.73684	FALSE	2.92857	FALSE	1.07895	FALSE	0.368421	TRUE	FALSE
C37	22	F		29	4	good	105	56	59	60	1.875	FALSE	0.983333	TRUE	1.05357	FALSE	1.07143	FALSE	FALSE
C38	21	M		27	7.33	good	238	79	34	47	3.01266	FALSE	0.723404	FALSE	0.43038	TRUE	0.594937	TRUE	TRUE
C39	22	M		30	3.33	poor	134	102	60	57	1.31373	FALSE	1.05263	FALSE	0.588235	TRUE	0.558824	TRUE	TRUE
C40	23	M		30	20	good	600	166	94	85	3.61446	FALSE	1.10588	FALSE	0.566265	TRUE	0.512048	TRUE	TRUE
C41	21	F		30	1	poor	175	44	57	60	3.97727	FALSE	0.95	TRUE	1.29545	FALSE	1.36364	FALSE	FALSE
C42	21	F		29	3.33	poor	65	65	21	18	1	FALSE	1.16667	FALSE	0.323077	TRUE	0.276923	TRUE	TRUE
C43	24	F		29	2	poor	87	35	20	27	2.48571	FALSE	0.740741	FALSE	0.571429	TRUE	0.771429	FALSE	FALSE
C44	27	F		30	1.33	poor	65	74	45	35	0.878378	TRUE	1.28571	FALSE	0.608108	TRUE	0.472973	TRUE	TRUE
C45	25	F		26	10	good	160	50	64	64	3.2	FALSE	1	TRUE	1.28	FALSE	1.28	FALSE	FALSE
C46	22	M		30	3.33	poor	196	109	65	71	1.79817	FALSE	0.915493	FALSE	0.59633	TRUE	0.651376	TRUE	TRUE
C47	22	F		29	5.33	good	80	79	73	55	1.01266	FALSE	1.32727	FALSE	0.924051	FALSE	0.696203	TRUE	FALSE
C48	22	F		27	6	good	180	65	52	26	2.76923	FALSE	2	FALSE	0.8	FALSE	0.4	TRUE	FALSE
C49	23	F		27	3.33	poor	307	200	23	52	1.535	FALSE	0.442308	FALSE	0.115	TRUE	0.26	TRUE	TRUE
C50	23	M		28	2	poor	27	37	35	25	0.72973	TRUE	1.4	FALSE	0.945946	FALSE	0.675676	TRUE	TRUE
C51	22	F		25	10	good	331	113	61	57	2.9292	FALSE	1.07018	FALSE	0.539823	TRUE	0.504425	TRUE	TRUE
C52	22	M		26	8	good	73	47	55	43	1.55319	FALSE	1.27907	FALSE	1.17021	FALSE	0.914894	FALSE	FALSE
C53	23	F		27	1.66	poor	47	48	35	36	0.979167	TRUE	0.972222	TRUE	0.729167	TRUE	0.75	FALSE	TRUE
C54	22	F		30	44	good	420	194	56	95	2.16495	FALSE	0.589474	FALSE	0.28866	TRUE	0.489691	TRUE	TRUE
C55	21	F		30	1	poor	74	70	29	54	1.05714	FALSE	0.537037	FALSE	0.414286	TRUE	0.771429	FALSE	FALSE
C56	24	M		29	6.66	good	228	88	76	65	2.59091	FALSE	1.16923	FALSE	0.863636	FALSE	0.738636	TRUE	FALSE
C57	21	F		28	1.33	poor	18	50	20	17	0.36	TRUE	1.17647	FALSE	0.4	TRUE	0.34	TRUE	TRUE
C58	25	M		28	21.66	good	160	115	120	126	1.3913	FALSE	0.952381	TRUE	1.04348	FALSE	1.09565	FALSE	FALSE
C59	20	F		30	2.66	poor	75	150	69	71	0.5	TRUE	0.971831	TRUE	0.46	TRUE	0.473333	TRUE	TRUE
C60	23	F		26	1	poor	162	210	38	40	0.771429	TRUE	0.95	TRUE	0.180952	TRUE	0.190476	TRUE	TRUE
C61	21	M		30	33.33	good	361	140	140	135	2.57857	FALSE	1.03704	TRUE	1	FALSE	0.964286	FALSE	FALSE
C62	25	F		28	4	good	111	68	69	54	1.63235	FALSE	1.27778	FALSE	1.01471	FALSE	0.794118	FALSE	FALSE
C63	26	M		29	4.66	good	123	44	38	72	2.79545	FALSE	0.527778	FALSE	0.863636	FALSE	1.63636	FALSE	FALSE
C64	25	F		27	1	poor	64	28	32	20	2.28571	FALSE	1.6	FALSE	1.14286	FALSE	0.714286	TRUE	FALSE
														1

## Sheet: CASE
S No.	Age	Gender	Affected Leg	CAIT SCORE	Core Strength value	CORE STRENGTH	CORE ENDURANCE (in sec)
					(mmHg)		Flexors	Extensors	Right LF	Left LF	F:E	Rating	R:L	Rating	R:E	Rating	L:E	Rating	OVERALL CORE ENDURANCE
P1	20	F	Right	7	1.66	poor	60	79	25	20	0.759494	TRUE	1.25	FALSE	0.316456	TRUE	0.253165	TRUE	TRUE
P2	22	F	Right	15	4	good	41	17	23	25	2.41176	FALSE	0.92	FALSE	1.35294	FALSE	1.47059	FALSE	FALSE
P3	24	F	Left	15	2	poor	60	20	15	11	3	FALSE	1.36364	FALSE	0.75	FALSE	0.55	TRUE	FALSE
P4	26	F	Right	20	6.6	good	36	13	36	49	2.76923	FALSE	0.734694	FALSE	2.76923	FALSE	3.76923	FALSE	FALSE
P5	21	M	Right	15	1.66	poor	19	22	21	28	0.863636	TRUE	0.75	FALSE	0.954545	FALSE	1.27273	FALSE	FALSE
P6	24	F	Right	16	4.66	good	194	73	61	62	2.65753	FALSE	0.983871	TRUE	0.835616	FALSE	0.849315	FALSE	FALSE
P7	24	F	Left	13	4.66	good	76	27	22	29	2.81481	FALSE	0.758621	FALSE	0.814815	FALSE	1.07407	FALSE	FALSE
P8	23	F	Right	13	4.66	good	300	41	34	46	7.31707	FALSE	0.73913	FALSE	0.829268	FALSE	1.12195	FALSE	FALSE
P9	24	F	Right	18	1	poor	118	95	39	60	1.24211	FALSE	0.65	FALSE	0.410526	TRUE	0.631579	TRUE	TRUE
P10	23	F	Right	11	1.66	poor	34	48	16	24	0.708333	TRUE	0.666667	FALSE	0.333333	TRUE	0.5	TRUE	TRUE
P11	22	F	Left	23	2	poor	54	45	41	51	1.2	FALSE	0.803922	FALSE	0.911111	FALSE	1.13333	FALSE	FALSE
P12	19	F	Left	10	2.66	poor	55	34	11	20	1.61765	FALSE	0.55	FALSE	0.323529	TRUE	0.588235	TRUE	TRUE
P13	22	F	Right	11	2.66	poor	106	31	16	22	3.41935	FALSE	0.727273	FALSE	0.516129	TRUE	0.709677	TRUE	TRUE
P14	23	F	Right	24	2	poor	120	59	31	49	2.0339	FALSE	0.632653	FALSE	0.525424	TRUE	0.830508	FALSE	FALSE
P15	25	F	Right	15	5.33	poor	22	50	22	33	0.44	TRUE	0.666667	FALSE	0.44	TRUE	0.66	TRUE	TRUE
P16	25	F	Right	18	6.66	good	133	48	55	44	2.77083	FALSE	1.25	FALSE	1.14583	FALSE	0.916667	FALSE	FALSE
P17	23	F	Left	8	2	poor	24	103	21	20	0.23301	TRUE	1.05	TRUE	0.203883	TRUE	0.194175	TRUE	TRUE
P18	22	F	Right	9	2	poor	91	35	8	13	2.6	FALSE	0.615385	FALSE	0.228571	TRUE	0.371429	TRUE	TRUE
P19	22	F	Left	20	4	good	78	72	37	27	1.08333	FALSE	1.37037	FALSE	0.513889	TRUE	0.375	TRUE	TRUE
P20	21	F		22	1	poor	71	84	34	47	0.845238	TRUE	0.723404	FALSE	0.404762	TRUE	0.559524	TRUE	TRUE
P21	22	F	Right	9	4	good	146	100	51	24	1.46	FALSE	2.125	FALSE	0.51	TRUE	0.24	TRUE	TRUE
P22	25	F	Right	15	2	poor	35	62	40	18	0.564516	TRUE	2.22222	FALSE	0.645161	TRUE	0.290323	TRUE	TRUE
P23	24	M	Left	15	6.66	good	128	99	60	62	1.29293	FALSE	0.967742	TRUE	0.606061	TRUE	0.626263	TRUE	TRUE
P24	26	M	Right	23	5.33	good	94	90	57	60	1.04444	FALSE	0.95	TRUE	0.633333	TRUE	0.666667	TRUE	TRUE
P25	25	F	Left	15	3.33	poor	75	82	21	15	0.914634	TRUE	1.4	FALSE	0.256098	TRUE	0.182927	TRUE	TRUE
P26	23	F	Left	18	4	good	210	140	77	90	1.5	FALSE	0.855556	FALSE	0.55	TRUE	0.642857	TRUE	TRUE
P27	20	F	Right	22	2.66	poor	160	76	13	20	2.10526	FALSE	0.65	FALSE	0.171053	TRUE	0.263158	TRUE	TRUE
P28	21	F	Right	19	4	good	115	117	50	30	0.982906	TRUE	1.66667	FALSE	0.42735	TRUE	0.25641	TRUE	TRUE
P29	21	F	Left	13	1.66	poor	187	145	70	100	1.28966	FALSE	0.7	FALSE	0.482759	TRUE	0.689655	TRUE	TRUE
P30	20	F	Right	21	2.66	poor	101	50	21	37	2.02	FALSE	0.567568	FALSE	0.42	TRUE	0.74	TRUE	TRUE
P31	21	F	Left	21	6.66	good	82	51	33	23	1.60784	FALSE	1.43478	FALSE	0.647059	TRUE	0.45098	TRUE	TRUE
P32	23	F	Left	15	6.66	good	42	64	8	12	0.65625	TRUE	0.666667	FALSE	0.125	TRUE	0.1875	TRUE	TRUE
P33	19	M	Left	18	2	poor	155	78	180	122	1.98718	FALSE	1.47541	FALSE	2.30769	FALSE	1.5641	FALSE	FALSE
P34	22	F	Left	20	3.33	poor	105	91	50	50	1.15385	FALSE	1	TRUE	0.549451	TRUE	0.549451	TRUE	TRUE
P35	23	F	Left	7	2.66	poor	186	51	52	47	3.64706	FALSE	1.10638	FALSE	1.01961	FALSE	0.921569	FALSE	FALSE
P36	23	F	Right	10	2.66	poor	245	60	22	28	4.08333	FALSE	0.785714	FALSE	0.366667	TRUE	0.466667	TRUE	TRUE
P37	20	F	Right	6	5.33	good	100	68	57	60	1.47059	FALSE	0.95	TRUE	0.838235	FALSE	0.882353	FALSE	FALSE
P38	21	F	Left	24	2.66	poor	113	68	38	35	1.66176	FALSE	1.08571	FALSE	0.558824	TRUE	0.514706	TRUE	TRUE
P39	20	M	Left	21	6	good	124	137	130	113	0.905109	TRUE	1.15044	FALSE	0.948905	FALSE	0.824818	FALSE	FALSE
P40	20	M	Right	24	4.66	good	174	116	56	80	1.5	FALSE	0.7	FALSE	0.482759	TRUE	0.689655	TRUE	TRUE
P41	21	F	Left	21	3.33	poor	86	69	17	24	1.24638	FALSE	0.708333	FALSE	0.246377	TRUE	0.347826	TRUE	TRUE
P42	22	F	Right	18	3.33	poor	161	89	47	58	1.80899	FALSE	0.810345	FALSE	0.52809	TRUE	0.651685	TRUE	TRUE
P43	21	M	Left	21	5.33	good	140	65	63	58	2.15385	FALSE	1.08621	FALSE	0.969231	FALSE	0.892308	FALSE	FALSE
P44	21	F	Right	23	5.33	good	161	111	62	90	1.45045	FALSE	0.688889	FALSE	0.558559	TRUE	0.810811	FALSE	FALSE
P45	25	F	Right	17	4.66	good	351	6	11	7	58.5	FALSE	1.57143	FALSE	1.83333	FALSE	1.16667	FALSE	FALSE
P46	24	M	Right	24	2.66	poor	175	89	31	24	1.96629	FALSE	1.29167	FALSE	0.348315	TRUE	0.269663	TRUE	TRUE
P47	23	F	Right	9	3.33	poor	300	50	37	7	6	FALSE	5.28571	FALSE	0.74	TRUE	0.14	TRUE	TRUE
P48	22	F	Right	21	4.66	good	66	46	23	25	1.43478	FALSE	0.92	FALSE	0.5	TRUE	0.543478	TRUE	TRUE
P49	21	F	Right	22	2	poor	172	52	33	35	3.30769	FALSE	0.942857	FALSE	0.634615	TRUE	0.673077	TRUE	TRUE
P50	23	F	Right	15	2	poor	75	124	59	30	0.604839	TRUE	1.96667	FALSE	0.475806	TRUE	0.241935	TRUE	TRUE
P51	24	F	Right	20	2.66	poor	109	73	54	52	1.49315	FALSE	1.03846	TRUE	0.739726	TRUE	0.712329	TRUE	TRUE
P52	23	M	Right	24	5.33	good	86	85	53	52	1.01176	FALSE	1.01923	TRUE	0.623529	TRUE	0.611765	TRUE	TRUE
P53	24	F	Right	9	2.66	poor	16	34	13	8	0.470588	TRUE	1.625	FALSE	0.382353	TRUE	0.235294	TRUE	TRUE
P54	21	F	Right	14	2.66	poor	35	29	38	31	1.2069	FALSE	1.22581	FALSE	1.31034	FALSE	1.06897	FALSE	FALSE
P55	23	M	Left	19	2	poor	75	27	50	42	2.77778	FALSE	1.19048	FALSE	1.85185	FALSE	1.55556	FALSE	FALSE
P56	25	F	Right	24	6.66	good	73	40	36	59	1.825	FALSE	0.610169	FALSE	0.9	FALSE	1.475	FALSE	FALSE
P57	24	F	Left	24	4	good	65	60	38	32	1.08333	FALSE	1.1875	FALSE	0.633333	TRUE	0.533333	TRUE	TRUE
P58	23	F	Right	19	4	good	32	10	11	19	3.2	FALSE	0.578947	FALSE	1.1	FALSE	1.9	FALSE	FALSE
P59	22	F	Right	23	3.33	poor	129	96	61	38	1.34375	FALSE	1.60526	FALSE	0.635417	TRUE	0.395833	TRUE	TRUE
P60	25	M	Right	23	6	good	224	98	90	32	2.28571	FALSE	2.8125	FALSE	0.918367	FALSE	0.326531	TRUE	FALSE
P61	26	M	Right	18	6.66	good	300	120	130	55	2.5	FALSE	2.36364	FALSE	1.08333	FALSE	0.458333	TRUE	FALSE
P62	26	M	Left	16	1.33	poor	66	24	16	36	2.75	FALSE	0.444444	FALSE	0.666667	TRUE	1.5	FALSE	FALSE
P63	24	F	Left	11	5.33	good	268	72	74	40	3.72222	FALSE	1.85	FALSE	1.02778	FALSE	0.555556	TRUE	FALSE
P64	28	M	Right	20	2	poor	100	45	48	80	2.22222	FALSE	0.6	FALSE	1.06667	FALSE	1.77778	FALSE	FALSE
